# Supplementary material for: Identifying patients with rheumatoid arthritis with moderate disease activity at risk of significant radiographic progression despite methotrexate treatment
Source: HighWire-hosted journal article supplement (doi:10.1136/rmdopen-2014-000018), 2015-07-01
Supplement: rmdopen-2014-000018supp.pdf [file rmdopen-2014-000018supp.pdf]

## **Supplementary File**

### **Identifying RA patients with moderate disease activity at risk of significant radiographic progression despite methotrexate treatment**

B. Fautrel, H. Nab, Y. Brault, G. Gallo

#### **Contents**

**Table S1** Patients with SRP by baseline erosion score

**Figure S1** Multivariate analysis: tertile baseline predictors of SRP after 3 years in patients with moderate disease activity despite MTX treatment

**Table S1** Patients with SRP by baseline erosion score

| Baseline erosion score | SRP after 2 years, n (%) |           |                             |                 | SRP after 3 years, n (%) |           |                             |                 |
|------------------------|--------------------------|-----------|-----------------------------|-----------------|--------------------------|-----------|-----------------------------|-----------------|
|                        | No                       | Yes       | Fisher's Exact Test P value | Phi coefficient | No                       | Yes       | Fisher's Exact Test P value | Phi coefficient |
| 0                      | 14 (73.7)                | 5 (26.3)  | 1.000                       | -0.003          | 12 (63.2)                | 7 (36.8)  | 0.794                       | -0.026          |
| >0                     | 57 (74.0)                | 20 (26.0) |                             |                 | 51 (66.2)                | 26 (33.8) |                             |                 |
| 0                      | 14 (73.7)                | 5 (26.3)  | 0.811                       | 0.072           | 12 (63.2)                | 7 (36.8)  | 0.118                       | 0.211           |
| >0-<4                  | 16 (80.0)                | 4 (20.0)  |                             |                 | 17 (85.0)                | 3 (15.0)  |                             |                 |
| ≥4                     | 41 (71.9)                | 16 (28.1) |                             |                 | 34 (59.6)                | 23 (40.4) |                             |                 |

The phi coefficient is a measure of association derived from the Pearson chi-square. SRP, significant radiographic progression.

**Figure S1** Multivariate analysis: tertile baseline predictors of SRP after 3 years in patient with moderate disease activity despite MTX treatment

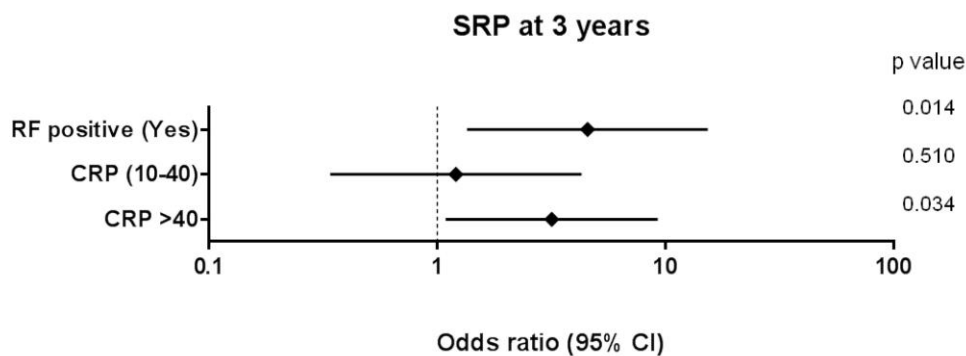

SRP, significant radiographic progression; MTX, methotrexate; RF, rheumatoid arthritis; CRP, C-reactive protein; CI, confidence interval.
